# Supplementary material for: 6‐Hydroxydopamine lesion and levodopa treatment modify the effect of buspirone in the substantia nigra pars reticulata
Source: PubMed Central journal article supplement (PMC7429490; doi:10.1111/bph.15145), 2020-07-06
Supplement: BPH-177-3957-s001.pdf [file BPH-177-3957-s001.pdf]

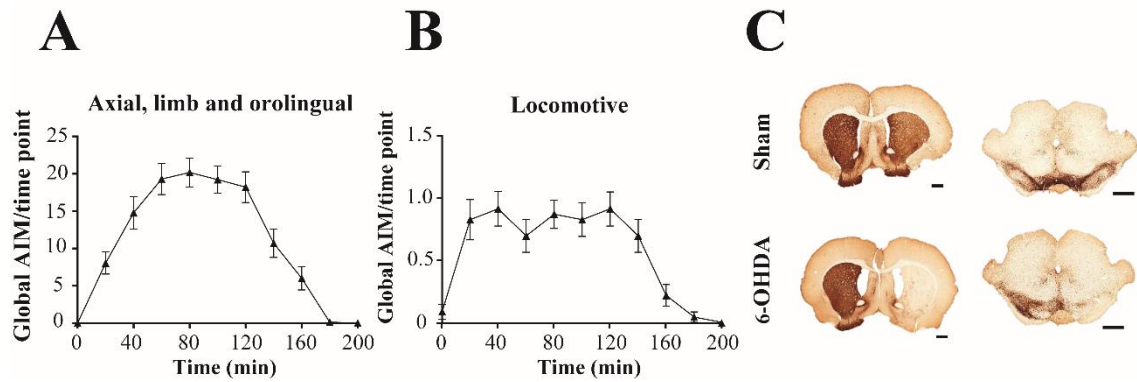

**Supplementary Figure 1. Validation of 6-OHDA lesion and L-DOPA induced abnormal involuntary movements.** Evolution of dyskinesia scores showing (A) the time course of AIM scores for axial, limb, and orolingual ratings and (B) locomotive score, on the last session after L-DOPA chronic treatment. Results are expressed as means  $\pm$  S.E.M. Coronal sections (C) from sham group and 6-OHDA group. Note the lack of TH immunoreactivity in the striatum and SN. Scale bar = 1 mm.
