# Supplementary material for: 6‐Hydroxydopamine lesion and levodopa treatment modify the effect of buspirone in the substantia nigra pars reticulata
Source: PubMed Central journal article supplement (PMC7429490; doi:10.1111/bph.15145), 2020-07-06
Supplement: BPH-177-3957-s002.pdf [file BPH-177-3957-s002.pdf]

### SNr neuron from sham rat

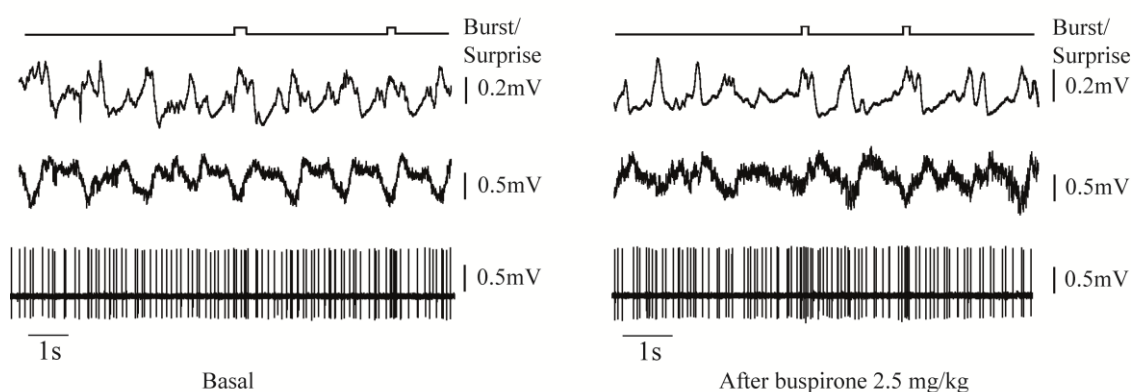

### SNr neuron from 6-OHDA rat

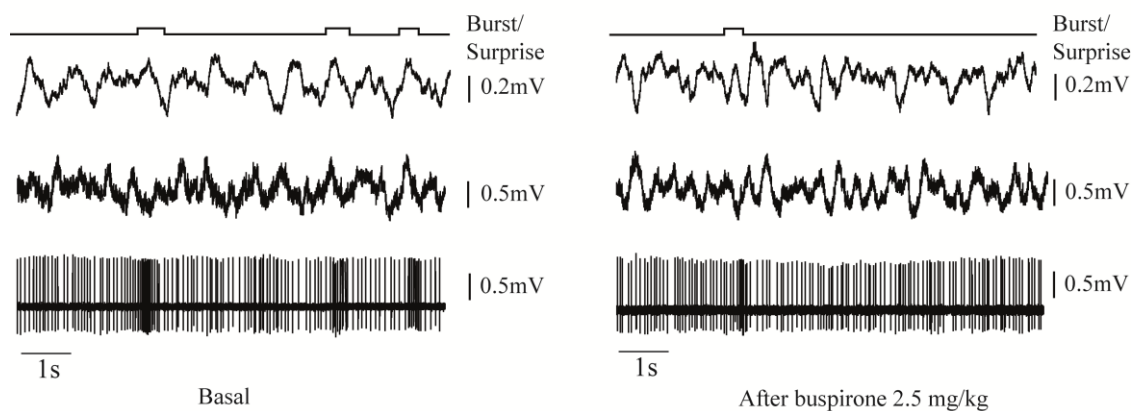

### SNr neuron from 6-OHDA L-DOPA rat

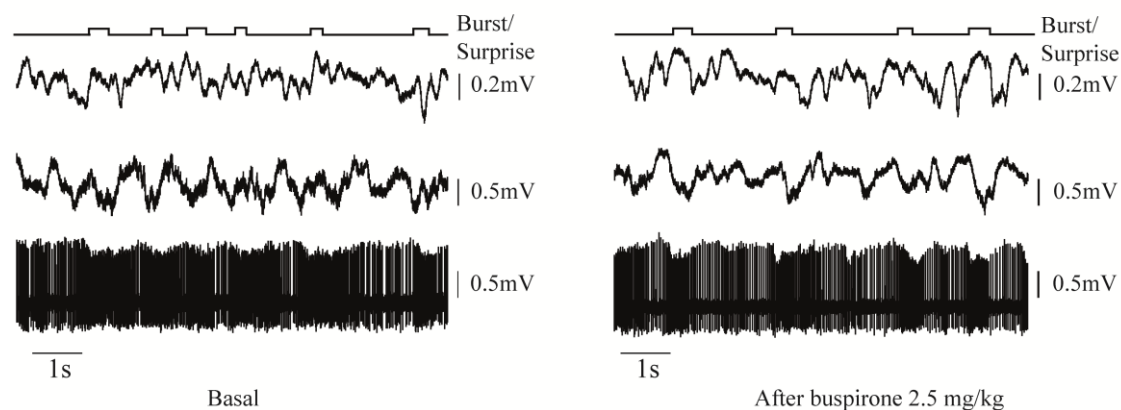

**Supplementary Figure 2. Effect of buspirone on SNr spike trains and oscillatory activity of the SNr and the cortex.** On the left, a recording track containing SNr spikes, SNr-LFP and ECoG from the basal neuron-firing pattern in the sham, 6-OHDA and 6-OHDA group. On the right, a recording track containing SNr spikes, SNr-LFP and ECoG from the same neurons after buspirone administration (2.5 mg/kg, i.v.). Note that buspirone did not alter burst-exhibiting pattern in sham group while buspirone reduce it in 6-OHDA and 6-OHDA L-DOPA groups.
