# Supplementary material for: 6‐Hydroxydopamine lesion and levodopa treatment modify the effect of buspirone in the substantia nigra pars reticulata
Source: PubMed Central journal article supplement (PMC7429490; doi:10.1111/bph.15145), 2020-07-06
Supplement: BPH-177-3957-s005.pdf [file BPH-177-3957-s005.pdf]

**Table S1. Statistical Details**

| <b>One-way ANOVA</b>                          |                       |                         |
|-----------------------------------------------|-----------------------|-------------------------|
|                                               | <b>F(DFn, DFd)</b>    | <b>P value</b>          |
| <b>Firing rate</b>                            | $F_{(2, 51)} = 3.738$ | $p < 0.05$              |
| <b>Coefficient of Variation</b>               | $F_{(2, 51)} = 4.111$ | $p < 0.05$              |
| <b>ECoG Power spectrum (AUC values)</b>       | $F_{(2, 51)} = 1.86$  | n.s.                    |
| <b>LFP Power spectrum (AUC values)</b>        | $F_{(2, 51)} = 1.86$  | $p < 0.05$              |
| <b>Coherence EcoG-SNr spikes (AUC values)</b> | $F_{(2, 51)} = 9.351$ | $p < 0.05$              |
| <b>Coherence LFP-SNr spikes (AUC values)</b>  | $F_{(2, 51)} = 12.52$ | $p < 0.05$              |
| <b>Coherence ECoG-LFP (AUC values)</b>        | $F_{(2, 51)} = 1.469$ | n.s.                    |
| <b>Nigral GABA basal levels</b>               | $F_{(2, 27)} = 0.123$ | n.s.                    |
| <b>Nigral GLU basal levels</b>                | $F_{(2, 27)} = 1.95$  | n.s.                    |
| <b>SERT expression</b>                        | $F_{(2, 12)} = 10.14$ | $p < 0.05$              |
| <b>5-HT<sub>1A</sub> expression</b>           | $F_{(2, 12)} = 32.77$ | $p < 0.05$              |
| <b>RM two-way ANOVA</b>                       |                       |                         |
| F(DFn, DFd), p value                          |                       |                         |
|                                               | <b>Group</b>          | <b>Drug</b>             |
| <b>Local administration of buspirone</b>      |                       |                         |
| <b>Firing Rate</b>                            | $F_{(2, 13)} = 3.38$  | $F_{(4, 52)} = 48.74^*$ |
| <b>Systemic administration of buspirone</b>   |                       |                         |
| <b>Firing Rate</b>                            | $F_{(2, 20)} = 1.158$ | $F_{(4, 80)} = 2.043$   |
| <b>Coefficient of Variation</b>               | $F_{(2, 20)} = 1.209$ | $F_{(4, 80)} = 0.852$   |
| <b>% effect on ECoG</b>                       | $F_{(2, 20)} = 0.339$ | $F_{(4, 80)} = 9.816^*$ |
| <b>% effect on LFP</b>                        | $F_{(2, 20)} = 0.027$ | $F_{(4, 80)} = 4.034^*$ |
| <b>% effect on coherence EcoG/SNr spikes</b>  | $F_{(2, 20)} = 1.785$ | $F_{(4, 80)} = 0.197$   |
| <b>% effect on coherence LFP/SNr spikes</b>   | $F_{(2, 20)} = 0.178$ | $F_{(4, 80)} = 2.633^*$ |

|                                              |                         |                           |
|----------------------------------------------|-------------------------|---------------------------|
| <b>% effect on coherence ECoG/LFP</b>        | $F_{(2, 20)} = 0.038$   | $F_{(4, 80)} = 5.718^*$   |
| <b>AUC (Net area) of GABA</b>                | $F_{(2, 24)} = 6.408^*$ | $F_{(15, 360)} = 2.611^*$ |
| <b>AUC (Net area) of GLU</b>                 | $F_{(2, 23)} = 5.654^*$ | $F_{(15, 345)} = 3.009^*$ |
| <b>Sistemic administration of 8-OHDPAT</b>   |                         |                           |
| <b>Firing Rate</b>                           | $F_{(2, 12)} = 5.917^*$ | $F_{(4, 48)} = 5.467^*$   |
| <b>Coefficient of Variation</b>              | $F_{(2, 12)} = 1.22$    | $F_{(4, 48)} = 1.127$     |
| <b>% effect on ECoG</b>                      | $F_{(2, 12)} = 1.231$   | $F_{(4, 48)} = 1.04$      |
| <b>% effect on LFP</b>                       | $F_{(2, 12)} = 0.228$   | $F_{(4, 48)} = 2.37$      |
| <b>% effect on coherence EcoG/SNr spikes</b> | $F_{(2, 12)} = 0.027$   | $F_{(4, 48)} = 2.977^*$   |
| <b>% effect on coherence LFP/SNr spikes</b>  | $F_{(2, 12)} = 0.454$   | $F_{(4, 48)} = 1.1$       |
| <b>% effect on coherence ECoG/LFP</b>        | $F_{(2, 12)} = 2.609^*$ | $F_{(4, 48)} = 2.796^*$   |
